# Supplementary material
Source: Research Square preprint supplement (doi:10.21203/rs.3.rs-11157/v3)
Supplement: Supplementary file 2 [file c7523e0fb068dde86b6c85bb.xlsx]

## Sheet: Sheet1
Table S3. Estimated value for each of the 19 parental alleles at each detected QTL for leaf and petal allometry models
				Parental accession
Phenotype	QTL	chr	bp	Bur-0	Can-0	Col-0	Ct-1	Edi-0	Hi-0	Kn-0	Ler-0	Mt-0	No-0	Oy-0	Po-0	Rsch-4	Sf-2	Tsu-0	Wil-2	Ws-2	Wu-0	Zu-0
Leaf4.PC1	LF4_1.1	1	26503880	NA	NA	NA	NA	NA	NA	NA	NA	NA	NA	NA	0.0668954	NA	NA	NA	NA	NA	NA	NA
	LF4_1.2	1	26989580	NA	NA	NA	NA	NA	NA	NA	NA	NA	NA	NA	-0.025391	NA	NA	NA	NA	NA	NA	NA
	LF4_1.3	3	22359929	-0.177413	-0.964323	0.0815202	-0.0170146	-0.413936	-0.0660446	-0.300971	-0.387962	0.526882	0.272957	0.316006	0.366446	-0.026616	-0.268975	-0.490172	-0.463957	-0.219203	0.112002	-0.219547
	LF4_1.4	3	23289364	-0.158786	-1.44849	0.036863	0.0781198	-0.364206	0.0480655	-0.30919	-0.0277997	0.529251	0.316566	0.19433	0.301506	-0.0287438	-0.294151	-0.409771	-0.516384	-0.235307	-0.0742849	-0.415156
Leaf4.PC2	LF4_2.1	2	11684374	0.442394	-0.51854	-0.0544901	0.366674	0.636086	0.432351	-0.0706081	-0.727548	0.0433899	0.21794	0.151451	0.143985	0.477079	-0.16911	-0.182572	0.278422	0.441056	0.257903	0.543947
Leaf7.PC1	LF7_1.1	3	18428879	-0.730563	-1.03769	0.40352	-0.16194	-0.276819	-0.0787689	-0.114122	-0.606213	0.31873	0.0886447	0.176127	0.207387	0.452391	-0.202398	-0.321557	-0.611013	0.0759143	-0.0515847	-0.372381
	LF7_1.2	3	18501211	-0.794402	-1.14651	0.429401	-0.480658	-0.300624	-0.0624701	-0.155627	-0.569721	0.369729	0.128382	0.228461	0.197939	0.776236	-0.201527	-0.288314	-0.627638	0.0625253	-0.0621614	-0.433124
	LF7_1.3	3	19820813	-0.617157	-1.31245	0.349504	-0.400425	-0.40181	0.0624616	-0.666956	-0.0699941	0.40853	0.175748	0.268345	0.230207	0.390132	-0.0963167	-0.196092	-0.639395	-0.351063	0.0470589	-0.393778
	LF7_1.4	3	19913837	-0.525223	-1.25014	0.393227	-0.350289	-0.407176	0.065649	-0.550811	-0.102355	0.382719	0.159919	0.190351	0.184717	0.314352	-0.163643	-0.223028	-0.607808	-0.329236	0.0324218	-0.387517
	LF7_1.5	3	20017319	-0.473058	-1.29054	0.406153	-0.341401	-0.391168	0.0830954	-0.558462	-0.135761	0.377803	0.179601	0.145356	0.139309	0.239796	-0.123876	-0.252266	-0.60232	-0.374517	0.0917988	-0.372369
	LF7_1.6	3	22606285	-0.341471	-1.25304	0.234936	-0.422734	-0.528934	0.45256	-0.894531	-0.0516469	0.594695	0.377865	0.109959	0.120105	-0.152001	-0.480482	-0.247529	-0.402566	-0.482931	0.034538	-0.470934
Leaf7.PC2	LF7_2.1	2	11199743	0.762849	-0.371291	-0.0240915	0.0624897	0.363924	0.269729	0.221745	-1.00589	-0.0222945	0.407527	0.0584555	0.0521048	0.316529	-0.37721	0.111255	0.305914	0.275152	0.481073	0.494882
Leaf7.PC3	LF7_3.1	1	11412672	NA	NA	NA	NA	NA	NA	NA	NA	NA	NA	NA	-0.186286	NA	NA	NA	NA	NA	NA	NA
	LF7_3.2	1	13540607	NA	NA	NA	NA	NA	NA	NA	NA	NA	NA	NA	NA	NA	NA	NA	NA	NA	NA	NA
	LF7_3.3	2	16858519	0.40673	0.201816	-0.312419	0.255638	0.971307	-0.337937	-0.255356	-0.54869	0.0976184	0.240229	-0.242423	-0.118544	0.163893	0.169739	0.836789	-0.37059	0.149077	-0.314432	0.0934978
	LF7_3.4	2	17297301	NA	NA	NA	NA	NA	NA	NA	NA	NA	NA	NA	NA	NA	NA	NA	NA	NA	NA	NA
Petal.PC1	PE_1.1	1	6315849	0.0384843	0.0598348	-0.0046709	-0.102416	-0.338089	-0.722436	0.154587	0.392447	0.317343	0.266191	0.193216	0.118839	-0.045238	0.000645581	-0.0950955	-0.0251853	-0.0458756	-0.643559	0.311058
	PE_1.2	1	16871886	-0.0757252	-0.434445	-0.265337	0.036697	0.0261614	-0.605956	0.30414	0.192683	0.224431	0.489832	-0.0712946	0.0162389	0.290082	-0.0624597	0.0620019	-0.00890046	-0.115616	0.0847717	0.176186
	PE_1.3	4	48813	0.346504	0.294033	-0.010685	-0.0158009	0.255532	0.0616875	0.11093	0.0504912	-0.192337	-0.50023	-0.140625	-0.0854506	-0.0142535	0.194497	0.123594	-0.0743733	0.251914	-0.201667	0.496652
Petal.PC2	PE_2.1	1	23470918	0.176005	0.0695433	0.0990011	-0.14926	-0.258992	0.0699202	-0.0779503	0.338581	0.177117	0.0336636	-0.160285	0.0626087	-0.59926	-0.335225	0.254417	0.214173	0.182518	-0.0596709	-0.0715735
	PE_2.2	1	24037255	NA	NA	NA	NA	NA	NA	NA	NA	NA	NA	NA	0.0943682	NA	NA	NA	NA	NA	NA	NA
	PE_2.3	1	24522632	NA	NA	NA	NA	NA	NA	NA	NA	NA	NA	NA	0.0161572	NA	NA	NA	NA	NA	NA	NA
	PE_2.4	2	1149631	0.17213	-0.123958	-0.00889236	0.208425	-0.322233	-0.0436582	-0.24736	0.0744286	0.102532	-0.200947	0.142059	0.0324509	0.000233939	0.0521209	0.0783469	0.0298128	-0.114189	0.099124	0.0288784
	PE_2.5	2	11208540	0.232581	0.373038	0.0846802	0.20542	-0.439414	-0.220981	-0.0559274	1.07342	-0.328569	-0.421274	-0.311708	-0.133637	-0.0507368	-0.0686288	0.253997	-0.0276973	-0.0255502	-0.0824717	0.0514965
	PE_2.6	3	19066266	-0.0835615	-0.256945	0.232452	-0.0990812	-0.0514998	0.300342	-0.211024	-0.445461	0.0967434	0.0796805	-0.144043	-0.123987	0.0672845	-0.500123	0.492117	0.468607	0.204943	-0.251034	0.133986
	PE_2.7	3	19805326	-0.0404897	-0.319156	0.37588	-0.145752	0.100765	0.295372	-0.436183	-0.313004	0.076053	-0.0293671	-0.0716785	-0.0736071	0.0111307	-0.765434	0.492886	0.506712	0.0509824	-0.18054	0.0570109
	PE_2.8	5	1399713	0.338974	0.193274	0.12965	0.352943	0.393393	-0.157379	0.125241	-0.0940309	0.173943	-0.332871	-0.132911	-0.0691344	0.254568	0.0869048	0.245233	-0.1002	-0.966041	0.50978	-0.468689
	PE_2.9	5	4428858	0.159565	0.565338	0.033347	0.232413	0.481868	-0.124428	0.179968	-0.231854	0.0238744	-0.383816	0.054798	0.188385	0.0340498	0.180819	0.0673342	-0.11538	-0.488671	0.416012	-0.221188
Alleles having the largest effect in increasing and decreasing the trait are underlined and in boldface type, respectively.
